# Supplementary material for: Caveolar disruption causes contraction of rat femoral arteries via reduced basal NO release and subsequent closure of BKCa channels
Source: PeerJ. 2015 May 26;3:e966. doi: 10.7717/peerj.966 (PMC4451037; doi:10.7717/peerj.966)
Supplement: Figure S3 [file peerj-03-966-s003.xlsx]

## Sheet: Figure 3
	mean	SEM	n			20K	20K/Filipin	80K	80K/Filipin
20K	5.356	1.656	14			2.8909	7.455	12.7988	13.6817
20K/Filipin	9.359	2.208	14			15.1651	18.7521	30.4767	29.9874
80K	18.603	2.92	14			3.04485	6.6035	16.9829	15.1734
80K/Filipin	18.727	3.118	14			0.67273	1.9733	9.9083	8.7061
						2.42431	4.76513	8.1687	8.5359
						8.5509	12.9894	18.5815	19.8315
						12.1903	18.3302	39.2838	41.5359
						1.31156	5.47316	15.9537	13.9396
						19.7418	29.3705	37.1184	38.8703
						5.24145	12.737	23.9542	27.079
						0.3693	1.14139	3.78705	4.53355
						0.3018	1.31154	5.9321	5.975
						2.33823	8.4123	20.1822	19.542
						0.74019	1.71204	17.3171	14.7881
