# Supplementary material for: Caveolar disruption causes contraction of rat femoral arteries via reduced basal NO release and subsequent closure of BKCa channels
Source: PeerJ. 2015 May 26;3:e966. doi: 10.7717/peerj.966 (PMC4451037; doi:10.7717/peerj.966)
Supplement: Figure S5 [file peerj-03-966-s005.xlsx]

## Sheet: Figure 5
	Mean	SEM			Mean	SEM
20 K - ECs	6.616	0.916			3.77	3.55
20 K - ECs + MCD	7.528	1.029			2.83	2.99
					4.32	4.19
					6.31	5.84
					12.42	18.93
					11.07	12.79
					0.67	0.78
					3.43	2.7
					10.88	9.12
					2.18	2.49
					15.44	19
					9.65	9.44
					16.79	12.47
					8.62	10.65
					4.4	3.63
					4.08	3.48
					6.04	8.81
					7.69	7.67
					1	1.5
					0.17	0.17
					8.24	7.76
					6.58	8.24
					3.4	8.24
					8.8	13.2
					6.61583	7.40167
