# Supplementary material for: Caveolar disruption causes contraction of rat femoral arteries via reduced basal NO release and subsequent closure of BKCa channels
Source: PeerJ. 2015 May 26;3:e966. doi: 10.7717/peerj.966 (PMC4451037; doi:10.7717/peerj.966)
Supplement: Figure S8 [file peerj-03-966-s008.xlsx]

## Sheet: Figure 8
	Mean	SEM		20K	TEA	TEA+20K	MCD-20K	MCD-TEA	MCD-TEA+20K			n=8
20K	6.059	1.438		12.2399	0.041	14.5618	9.6428	9.6654	14.9589
TEA	0.645	0.376		2.1634	0	2.8499	2.5386	2.3172	3.8312
TEA+20K	8.009	1.583		4.3955	0	6.1934	3.3433	-0.2095	5.4055
MCD-20K	6.19	1.322		6.6872	0.1546	7.9667	5.1228	0.2588	6.4623
MCD-TEA	2.232	1.153		1.0914	0.6209	2.5421	1.738	-0.1349	0.921
MCD-TEA+20K	7.238	1.616		4.5009	0.7362	7.8419	5.7038	1.483	5.7342
				5.6755	0.433	7.9834	9.6327	0.9738	8.0352
				11.7216	3.1779	14.1366	11.8003	3.5021	12.555
				6.05943	0.64545	8.00948	6.19029	2.23199	7.23791
