# Supplementary material for: Caveolar disruption causes contraction of rat femoral arteries via reduced basal NO release and subsequent closure of BKCa channels
Source: PeerJ. 2015 May 26;3:e966. doi: 10.7717/peerj.966 (PMC4451037; doi:10.7717/peerj.966)
Supplement: Figure S10 [file peerj-03-966-s010.xlsx]

## Sheet: Figure 10
20 K/Bay K	IBTX	20K/Bay/L-NAME	IBTX/ LNAME			Mean	N	SEM		n=8
4.83036	12.8748	17.6618	21.5207		20 K/ Bay K	5.422	8	0.924
5.43224	13.6835	14.9596	20.274		20 K/ Bay K/ IBTX	12.29	8	1.468
5.549	12.2218	15.8512	16.8289		20 K/ Bay K/ L-NAME	14.669	8	1.205
9.43224	16.5756	16.631	18.4295		20 K/ Bay K/ L-NAME/ IBTX	18.17	8	1.08
1.036	2.82548	7.2318	12.4782
8.49964	15.086	14.7755	17.5513
4.0712	13.6646	17.4954	21.7086
4.52592	11.3846	12.7496	16.5722
5.42207	12.2896	14.6695	18.1704
